# Supplementary material for: Evaluation of Eosinopenia as a SIRS Biomarker in Critically Ill Horses
Source: MDPI journal article supplement (doi:10.3390/ani12243547), 2022-12-15
Supplement: s1 [file s1]

Supplementary Table S1. Demographics and clinical data of horses received in the emergency service on admission.

| Horse | Group | Age (Years) | Gender | Heart rate (bpm) | Body Temperature (°C) | Respiratory rate (bpm) |
|-------|-------|-------------|--------|------------------|-----------------------|------------------------|
| 1     | A     | 3           | F      | 54               | 37.3                  | 24                     |
| 2     | A     | 4           | F      | 48               | 38.1                  | 16                     |
| 3     | A     | 4           | M      | 52               | 37.8                  | 20                     |
| 4     | A     | 6           | M      | 44               | 37.5                  | 16                     |
| 5     | A     | 10          | M      | 52               | 37.8                  | 24                     |
| 6     | A     | 20          | F      | 54               | 38.3                  | 24                     |
| 7     | A     | 5           | M      | 52               | 37.5                  | 16                     |
| 8     | A     | 8           | M      | 52               | 38.1                  | 24                     |
| 9     | A     | 15          | F      | 48               | 38.1                  | 36                     |
| 10    | A     | 3           | M      | 44               | 37.4                  | 20                     |
| 11    | A     | 10          | H      | 52               | 37.9                  | 24                     |
| 12    | A     | 8           | H      | 48               | 38.1                  | 24                     |
| 13    | A     | 4           | H      | 52               | 37.7                  | 20                     |
| 14    | A     | 11          | M      | 48               | 38.4                  | 40                     |
| 15    | A     | 6           | H      | 52               | 37.6                  | 32                     |
| 16    | A     | 16          | M      | 42               | 38.2                  | 12                     |
| 17    | B     | 15          | M      | 80               | 39.1                  | 20                     |
| 18    | B     | 9           | M      | 68               | 38.6                  | 36                     |
| 19    | B     | 8           | M      | 64               | 37.3                  | 40                     |
| 20    | B     | 18          | M      | 68               | 38.4                  | 44                     |
| 21    | B     | 6           | M      | 64               | 39.4                  | 32                     |
| 22    | B     | 13          | M      | 72               | 38.7                  | 24                     |
| 23    | B     | 16          | M      | 78               | 37.7                  | 34                     |
| 24    | B     | 9           | M      | 68               | 38.2                  | 38                     |
| 25    | B     | 4           | M      | 84               | 38.4                  | 36                     |
| 26    | B     | 18          | M      | 72               | 38.2                  | 38                     |
| 27    | B     | 3           | H      | 64               | 37.9                  | 36                     |
| 28    | B     | 12          | H      | 88               | 36.3                  | 38                     |
| 29    | B     | 7           | H      | 68               | 38.3                  | 34                     |
| 30    | B     | 15          | M      | 60               | 39.3                  | 32                     |
| 31    | B     | 3           | M      | 88               | 39.8                  | 52                     |
| 32    | B     | 5           | M      | 68               | 37.7                  | 32                     |
| 33    | B     | 14          | M      | 72               | 38.2                  | 34                     |
| 34    | B     | 5           | M      | 64               | 37.8                  | 34                     |
| 35    | B     | 8           | H      | 68               | 38.3                  | 32                     |
| 36    | B     | 3           | M      | 72               | 39.2                  | 32                     |
| 37    | B     | 7           | M      | 68               | 38.8                  | 16                     |

bpm: beats per minute; °C: degree Celsius; rpm: respirations per minute; F: Female; M: Male;

Supplementary Table S2. Value of the differential WBC on admission.

| Horse | Segmented Neutrophils<br>( cell/ $\mu$ L ) | Band Neutrophils<br>( cell/ $\mu$ L ) | Lymphocytes<br>( cell/ $\mu$ L ) | Monocytes<br>( cell/ $\mu$ L ) |
|-------|--------------------------------------------|---------------------------------------|----------------------------------|--------------------------------|
| 1     | 1296                                       | 0                                     | 3834                             | 108                            |
| 2     | 5457                                       | 0                                     | 4708                             | 107                            |
| 3     | 6586                                       | 0                                     | 2136                             | 178                            |
| 4     | 4662                                       | 0                                     | 1638                             | 0                              |
| 5     | 4928                                       | 0                                     | 1024                             | 256                            |
| 6     | 9516                                       | 0                                     | 2562                             | 122                            |
| 7     | 816                                        | 136                                   | 748                              | 0                              |
| 8     | 1452                                       | 0                                     | 1782                             | 66                             |
| 9     | 5916                                       | 91                                    | 2448                             | 816                            |
| 10    | 7521                                       | 109                                   | 1962                             | 1308                           |
| 11    | 4331                                       | 639                                   | 2130                             | 0                              |
| 12    | 3990                                       | 0                                     | 1254                             | 399                            |
| 13    | 156                                        | 0                                     | 4104                             | 540                            |
| 14    | 5184                                       | 0                                     | 2673                             | 81                             |
| 15    | 6552                                       | 0                                     | 2366                             | 182                            |
| 16    | 8710                                       | 0                                     | 3770                             | 520                            |
| 17    | 9370                                       | 0                                     | 1356                             | 565                            |
| 18    | 768                                        | 0                                     | 66                               | 66                             |
| 19    | 6840                                       | 0                                     | 760                              | 0                              |
| 20    | 9858                                       | 0                                     | 742                              | 0                              |
| 21    | 4928                                       | 968                                   | 2728                             | 176                            |
| 22    | 11136                                      | 384                                   | 1024                             | 384                            |
| 23    | 7347                                       | 837                                   | 930                              | 186                            |
| 24    | 5400                                       | 0                                     | 1440                             | 288                            |
| 25    | 1500                                       | 0                                     | 1200                             | 300                            |
| 26    | 3555                                       | 0                                     | 900                              | 45                             |
| 27    | 6370                                       | 0                                     | 2548                             | 182                            |
| 28    | 874                                        | 0                                     | 2812                             | 38                             |
| 29    | 7840                                       | 560                                   | 2688                             | 0                              |
| 30    | 13695                                      | 0                                     | 1550                             | 0                              |
| 31    | 1100                                       | 0                                     | 960                              | 500                            |
| 32    | 2508                                       | 0                                     | 3072                             | 114                            |
| 33    | 840                                        | 0                                     | 1260                             | 0                              |
| 34    | 1242                                       | 1064                                  | 1368                             | 76                             |
| 35    | 3250                                       | 0                                     | 1250                             | 0                              |
| 36    | 10360                                      | 1680                                  | 1960                             | 140                            |
| 37    | 6360                                       | 0                                     | 4240                             | 0                              |
